# Supplementary material for: Application of an Inter-Species Extrapolation Method for the Prediction of Drug Interactions between Propolis and Duloxetine in Humans
Source: MDPI journal article supplement (doi:10.3390/ijms21051862), 2020-03-09
Supplement: s1 [file s1]

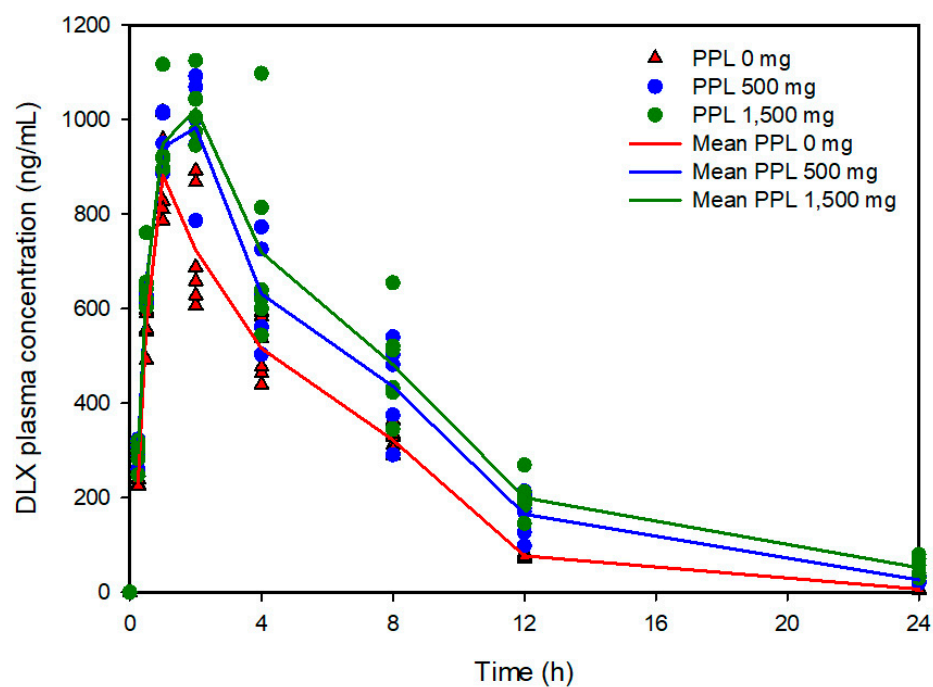

Figure S1A. Individual and mean of population of plasma concentration-time curve of DLX after oral administration of DLX in rats (n=6/group)

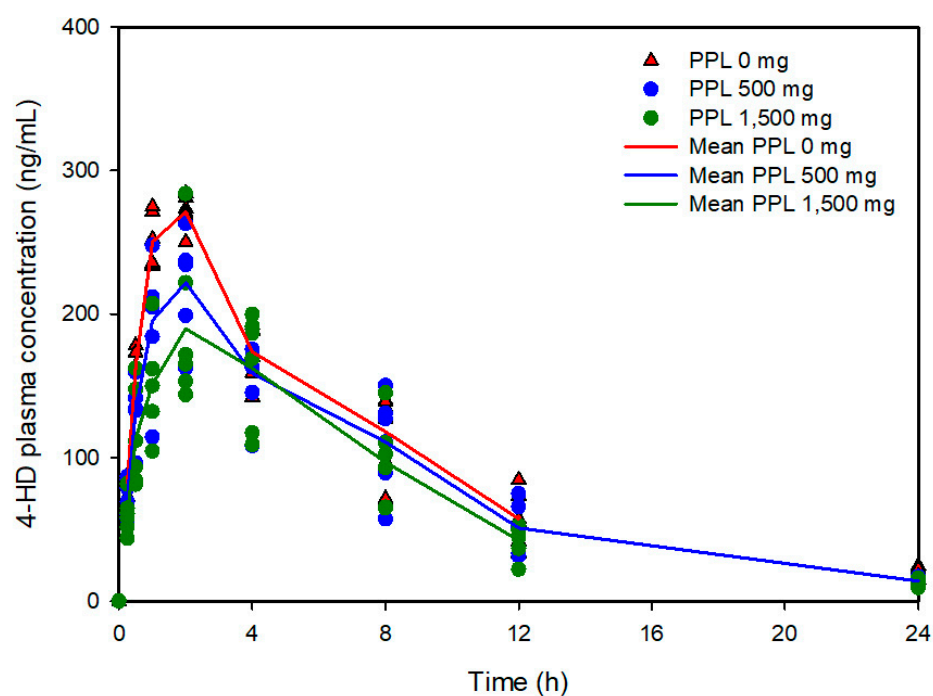

Figure S1B. Individual and mean of population of plasma concentration-time curve of 4-HD after oral administration of DLX in rats (n=6/group)
